# Supplementary material for: Cohesin reconstitution and homologous recombination repair of DNA double-strand breaks in late mitosis
Source: eLife. 2025 Nov 11;13:RP92706. doi: 10.7554/eLife.92706 (PMC12604858; doi:10.7554/eLife.92706)
Supplement: Figure 1—source data 4. [file elife-92706-fig1-data4.xlsx]

## Sheet: eLife_Fig1E
	Smc1			Scc1
	exp #1	exp #2	exp #3	exp #1	exp #2	exp #3
G2/M	100	100	100	100	100	100
Tel arrest	77.5563	58.3138	69.4528	13.1772	13.3167	15.7182
2h mock	56.9666	31.5534	53.0755	9.03166	8.78247	13.7169
2h HO	124.049	39.7715	57.5518	166.369	103.848	144.875
2h Phle	108.566	49.1223	32.1963	66.8252	44.1678	64.4204
