# Supplementary material for: Cohesin reconstitution and homologous recombination repair of DNA double-strand breaks in late mitosis
Source: eLife. 2025 Nov 11;13:RP92706. doi: 10.7554/eLife.92706 (PMC12604858; doi:10.7554/eLife.92706)
Supplement: Figure 2—figure supplement 3—source data 1. [file elife-92706-fig2-figsupp3-data1.xlsx]

## Sheet: eLife_Fig2-FS3
Distance from the HOcs (Kb)	G2/M (-HO)	G2/M (+HO)
0.15	0.121165	0.390932
0.5	0.125112	0.333398
1.5	0.104689	0.303969
3	0.146971	0.544261
10	0.19239	0.586648
