# Supplementary material for: Cohesin reconstitution and homologous recombination repair of DNA double-strand breaks in late mitosis
Source: eLife. 2025 Nov 11;13:RP92706. doi: 10.7554/eLife.92706 (PMC12604858; doi:10.7554/eLife.92706)
Supplement: Figure 2—source data 3. [file elife-92706-fig2-data3.xlsx]

## Sheet: eLife_Fig2C
	Tel (-HO)			Tel (+HO)
Distance from HOcs (Kb)	exp #1	exp #2	exp #3	exp #1	exp #2	exp #3
0.15	0.139919	0.087422	0.03172	0.095919	0.096379	0.095336
0.5	0.10984	0.076647	0.026369	0.095918	0.07433	0.093878
1.5	0.067418	0.053921	0.02198	0.07418	0.078444	0.058301
3	0.117755	0.070017	0.031552	0.075565	0.084427	0.058471
10	0.154305	0.096312	0.051256	0.111403	0.109489	0.039387
