# Supplementary material for: Cohesin reconstitution and homologous recombination repair of DNA double-strand breaks in late mitosis
Source: eLife. 2025 Nov 11;13:RP92706. doi: 10.7554/eLife.92706 (PMC12604858; doi:10.7554/eLife.92706)
Supplement: Figure 3—figure supplement 2—source data 3. [file elife-92706-fig3-figsupp2-data3.xlsx]

## Sheet: eLife_Fig3-FS2C
	MATa			HOcs DSB			MATα
	exp #1	exp #2	exp #3	exp #1	exp #2	exp #3	exp #1	exp #2	exp #3
Tel	100	100	100	1.64876	0.928453	0.329005	2.45632	0.595133	0.782587
+ßE (1h)	23.8557	30.6287	23.3328	60.5268	62.7349	69.7104	20.5745	15.9605	17.5984
30'	24.7923	27.7431	19.336	38.177	28.9065	27.7652	24.0237	20.768	18.382
60'	25.2937	27.34	24.3044	33.8615	21.9084	20.973	26.5214	25.9365	27.1005
90'	22.4572	32.6763	24.4342	17.9475	18.3629	16.9098	35.338	30.9983	33.2489
120'	22.7277	29.1323	25.245	16.0303	17.3977	9.95019	44.0256	29.9731	36.7169
180'	18.2055	25.6605	20.5665	13.4427	14.6729		48.5429	32.5635	40.3272

## Sheet: eLife_Fig3-FS2F
	MATa			HOcs DSB			MATα
	exp #1	exp #2	exp #3	exp #1	exp #2	exp #3	exp #1	exp #2	exp #3
Tel	100	100	100	2.91446	0.863723	0.819806	1.5296	0.881986	3.16587
+ßE (1h)	32.1694	44.6213	26.8296	69.9163	64.9471	69.8533	8.58121	12.9421	26.4897
30'	29.6943	34.171	30.498	42.3759	34.8998	52.869	15.6425	20.6757	35.2473
60'	27.9738	29.4241	27.1463	27.2884	23.0428	35.037	21.2466	23.802	37.9057
90'	25.2256	27.6114	29.2085	15.164	17.5282	28.8074	24.6966	29.5724	39.71
120'	27.429	23.6458	25.773	15.0462	14.9141	19.6311	29.9563	31.6126	40.7314
180'	24.9304	23.4025	21.6756	13.1391	15.1126	15.3481	42.142	36.91	44.43

## Sheet: eLife_Fig3-FS2I
	MATa			HOcs DSB			MATα
	exp #1	exp #2	exp #3	exp #1	exp #2	exp #3	exp #1	exp #2	exp #3
Tel	100	100	100	0.438634	1.04578	0.0610299	0.688716	1.08164	0.111423
+ßE (1h)	34.1914	17.4923	26.1206	79.5475	63.4713	63.075	1.1181	1.30792	0.115629
30'	26.0248	8.67947	14.6605	50.0227	41.0565	36.3905	27.9972	17.973	9.67452
60'	20.2053	8.22891	25.8333	26.2315	23.8813	30.4737	32.7979	19.7298	27.1902
90'	16.6722	9.48022	14.0363	16.7912	15.8797	9.37779	49.8709	26.5188	31.1849
120'	22.1979	10.3286	13.5797	13.1989	10.0711	13.0099	61.1615	45.9732	40.3731
180'	22.733	11.0423	14.4109	12.6955	6.38678	4.12071	63.9452	63.4375	43.0101
