# Supplementary material for: Cohesin reconstitution and homologous recombination repair of DNA double-strand breaks in late mitosis
Source: eLife. 2025 Nov 11;13:RP92706. doi: 10.7554/eLife.92706 (PMC12604858; doi:10.7554/eLife.92706)
Supplement: Figure 3—source data 3. [file elife-92706-fig3-data3.xlsx]

## Sheet: eLife_Fig3A
	729 bp								5.7 Kb
	G2			Telophase					G2			Telophase
Time (h)	exp #1	exp #2	exp #3	exp #1	exp #2	exp #3		Time (h)	exp #1	exp #2	exp #3	exp #1	exp #2	exp #3
0	0	0	0	0	0	0		0	0	0	0	0	0	0
1	0.267371	0.48765	0.456778	0.281198	0.388074	0.243063		1	0.0583996	0.0510467	0.0324242	0.0709445	0.0275754	0.041321
2	0.48258	0.759092	0.771843	0.500075	0.551136	0.526735		2	0.0853854	0.313578	0.185676	0.139046	0.0792422	0.0503418
3	0.762199	0.827791	0.842923	0.610765	0.733023	0.752949		3	0.412239	0.665186	0.551618	0.190276	0.249106	0.237976
4	0.829905	0.862816	0.816322	0.698678	0.859863	0.890518		4	0.488594	0.845699	0.820524	0.508359	0.52424	0.526313

## Sheet: eLife_Fig3F
	MATa			HO cut			MATalpha
	exp #1	exp #2	exp #3	exp #1	exp #2	exp #3	exp #1	exp #2	exp #3
Tel arrest	100	100	100	4.12753	2.48004	3.4002	9.97971	8.33113	3.28512
1h + ß-Estradiol	28.5559	26.4099	27.2682	69.7076	68.0562	73.1079	9.6494	12.8793	18.9943
30'	25.6349	24.4195	20.3391	48.9913	41.2695	49.7574	23.9552	20.0283	28.442
60'	18.9051	22.7342	19.2495	19.9619	25.9976	34.4017	27.8589	29.0091	32.2326
90'	20.2583	21.4567	21.5671	15.438	17.8139	31.1745	32.8803	34.1216	46.1254
120'	22.3338	22.5911	18.1224	13.0157	14.7635	24.0538	42.459	36.2748	49.8018
180'	26.3504	23.4999	21.2373	16.0695	13.6468	21.6546	52.5037	47.5585	56.0866
