# Supplementary material for: Cohesin reconstitution and homologous recombination repair of DNA double-strand breaks in late mitosis
Source: eLife. 2025 Nov 11;13:RP92706. doi: 10.7554/eLife.92706 (PMC12604858; doi:10.7554/eLife.92706)
Supplement: Figure 4—figure supplement 1—source data 3. [file elife-92706-fig4-figsupp1-data3.xlsx]

## Sheet: eLife_Fig4-FS1C
	MATa								DSB								DSB
	WT (-IAA)			Smc3-aid* (+IAA)					WT (-IAA)			Smc3-aid* (+IAA)					WT (-IAA)			Smc3-aid* (+IAA)
	exp #1	exp #2	exp #3	exp #1	exp #2	exp #3			exp #1	exp #2	exp #3	exp #1	exp #2	exp #3			exp #1	exp #2	exp #3	exp #1	exp #2	exp #3
Tel arrest	100	100	100	100	100	100		Tel arrest	4.12753	2.48004	3.4002	0.22	0.25	0.610265		Tel arrest	9.97971	8.33113	3.28512	0.316	0.1783	0.43035
+ßE (1h)	28.5559	26.4099	27.2682	49.5	51	43.1276		+ßE (1h)	69.7076	68.0562	73.1079	52.63	47.56	50.7422		+ßE (1h)	9.6494	12.8793	18.9943	2.734	0.2637	0.371689
30'	25.6349	24.4195	20.3391	41.82	48.52	40.3728		30'	48.9913	41.2695	49.7574	36.838	35.402	47.6945		30'	23.9552	20.0283	28.442	6.866	3.0664	2.24273
60'	18.9051	22.7342	19.2495	38.23	44.14	43.0123		60'	19.9619	25.9976	34.4017	20.37	24.248	39.8115		60'	27.8589	29.0091	32.2326	3.18	11.2269	5.34195
90'	20.2583	21.4567	21.5671	49.47	47.74	40.6142		90'	15.438	17.8139	31.1745	16.804	22.817	31.2163		90'	32.8803	34.1216	46.1254	7.51	14.9404	8.49472
120'	22.3338	22.5911	18.1224	55.26	46.03	45.6624		120'	13.0157	14.7635	24.0538	15.91	20.415	23.8917		120'	42.459	36.2748	49.8018	11.506	15.7898	15.0595
180'	26.3504	23.4999	21.2373	45.67	45.78	44.2498		180'	16.0695	13.6468	21.6546	13.83	18.852	17.6712		180'	52.5037	47.5585	56.0866	13.7358	18.7254	17.0389
