# Supplementary material for: Cohesin reconstitution and homologous recombination repair of DNA double-strand breaks in late mitosis
Source: eLife. 2025 Nov 11;13:RP92706. doi: 10.7554/eLife.92706 (PMC12604858; doi:10.7554/eLife.92706)
Supplement: Figure 4—source data 3. [file elife-92706-fig4-data3.xlsx]

## Sheet: eLife_Fig4D
	WT			OsTIR1			Smc3-aid* OsTIR1			Smc3-aid*
	exp #1	exp #2	exp #3	exp #1	exp #2	exp #3	exp #1	exp #2	exp #3	exp #1	exp #2	exp #3
Rel to WT	1	1	1	1.11317	1.15884	1.1553	0.949826	1.0902	0.767009	0.990271	1.19952	1.04948
